# Supplementary material
Source: Springer Nature journal article supplement (https://www.springermedizin.de/resource/supplementary/13054_2009_8350_MOESM2_ESM.pdf/9731768)

# RIFLE classification

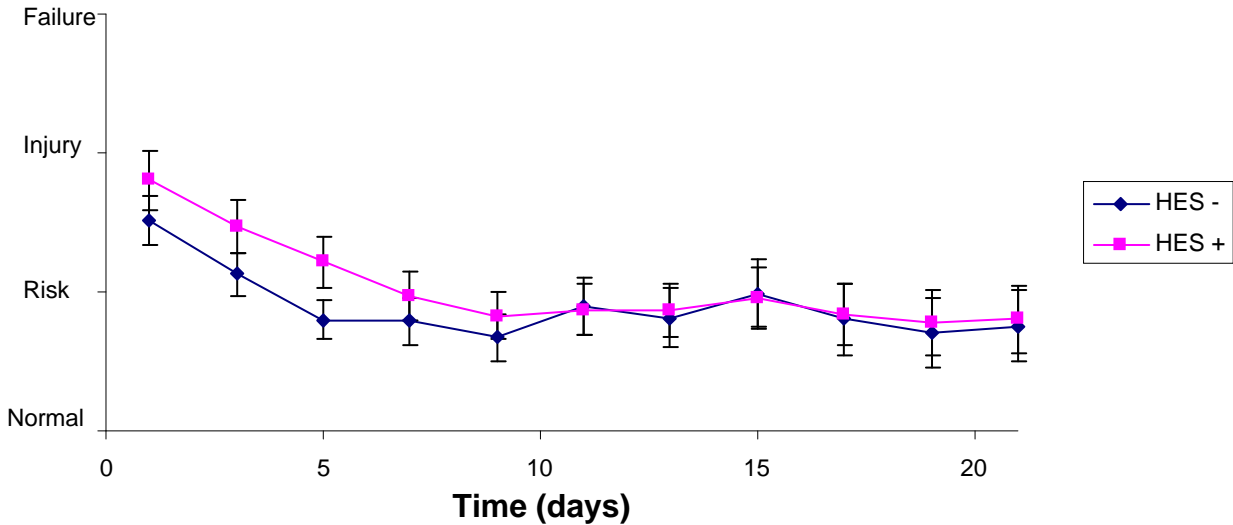

Supplement: MOESM2 [file 9731768]
